# Supplementary material
Source: publisher figshare collection journal article supplement (https://acs.figshare.com/ndownloader/files/4451521)
Supplement: Supplementary file 1 [file 4451521]

## SUPPLEMENTARY INFORMATION

**Figure S1** The chemical structures and suppression of on Ag-stimulated degranulation in RBL-2H3 cells by various compounds including **WC**.

**Figure S2** Changes in **WC** components during the maturing process. **SA**; syringaldehyde, **Lyo**; lyoniresinol, **GA**; gallic acid, **HbA**; p-hydroxybenzoic acid, **VA**; vanillic acid, **SyA**; syringic acid, **V**; vanillin, **SiA**; Sinapinaldehyde, **CA**; coniferylaldehyde.

**Table S1.** The ED<sub>50</sub> values of inhibitory effects of benzoic acid derivatives in **WC** on Ag-mediated RBL-2H3 cell degranulation.
